# Supplementary material for: Mobile Health Apps for Self-Management of Rheumatic and Musculoskeletal Diseases: Systematic Literature Review
Source: PubMed Central journal article supplement (PMC6904900; doi:10.2196/14730), 2019-11-26

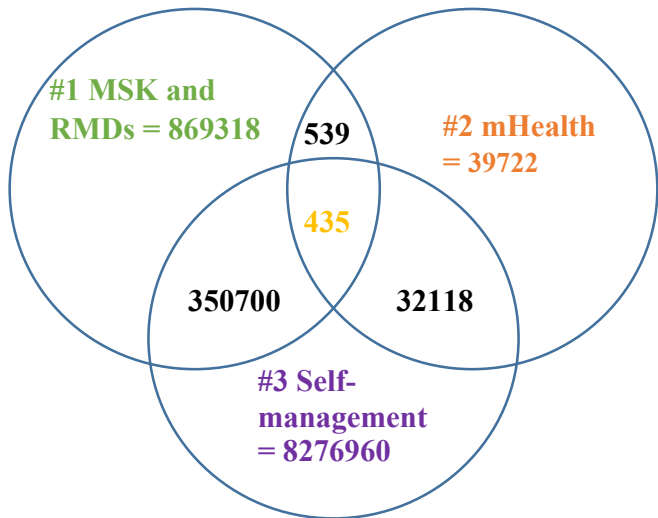

Supplement: mhealth_v7i11e14730_app2.pdf [file mhealth_v7i11e14730_app2.pdf]
