# Supplementary material for: Mobile Health Apps for Self-Management of Rheumatic and Musculoskeletal Diseases: Systematic Literature Review
Source: PubMed Central journal article supplement (PMC6904900; doi:10.2196/14730), 2019-11-26
Supplement: mhealth_v7i11e14730_app3.pdf [file mhealth_v7i11e14730_app3.pdf]

Supplementary Table 1. Summary table of all 32 articles included in the review and type and purposes of studies included.

| First Author                 | Target Disease of the App | Country of Development of the App | App name                | Data collected by the App                                                            | Purpose of each study                                                |
|------------------------------|---------------------------|-----------------------------------|-------------------------|--------------------------------------------------------------------------------------|----------------------------------------------------------------------|
| Li et al. [16]\$             | OA                        | US                                | FitBit Flex             | Physical activity                                                                    | Improvement of physical activity and mobility.                       |
| Skrepnik et al. [17]\$       | OA                        | US                                | OA GO                   | Sleep, Pain, Mood, Physical activity                                                 | Improvement of physical activity and mobility.                       |
| Kristjansdottir et al. [18]  | Fibromyalgia              | Norway                            | N/A                     | Fatigue, Sleep, Pain, Mood, Depression/Anxiety, Physical activity, Global Well being | Efficacy in reducing catastrophism                                   |
| Kristjansdottir et al. [19]  | Fibromyalgia              | Norway                            | N/A                     | Fatigue, Sleep, Pain, Mood, Depression/Anxiety, Physical activity, Global Well being | Efficacy in reducing catastrophism                                   |
| <b>Observational studies</b> |                           |                                   |                         |                                                                                      |                                                                      |
| Paxton et al. [20]\$         | OA                        | US                                | Fitbit Zip <sup>R</sup> | Sleep, Pain, Physical activity                                                       | Feasibility and efficacy of a self-rehabilitation program after TKA. |
| Harmelink et al. [21]\$      | OA                        | The Netherlands                   | PROMOVE3D               | Physical activity                                                                    | Feasibility and efficacy of a self-rehabilitation program after TKA. |
| Bults et al. [22]            | Fibromyalgia              | The Netherlands                   | N/A                     | Pain                                                                                 | Efficacy in reducing pain.                                           |
| Kvien et al. [23]            | RA                        | Norway                            | N/A                     | Fatigue, Pain, Disease activity, HAQ Well-Being, SF-36                               | Compare PROs and e-PROs                                              |
| Heiberg et al. [24]          | RA                        | Norway                            | N/A                     | Fatigue, Sleep, Pain, Disease activity, HAQ                                          | Compare PROs and e-PROs                                              |
| Richter et al. [25]          | RA, SPA, LES              | Germany                           | DocuMed.rh              | Disease activity, SF-36                                                              | Compare PROs and e-PROs                                              |
| Stinson et al. [26]*         | JIA                       | Canada                            | e-Ouch                  | Fatigue, Sleep, Pain, TJC, Mood, morning stiffness, Social support, Work.            | Assessment of App usability and/or acceptability                     |
| Stinson et al. [27]*         | JIA                       | Canada                            | e-Ouch                  | Fatigue, Sleep, Pain, TJC, Mood, morning stiffness, Social support, Work.            | Assessment of App usability and/or acceptability                     |

|                              |                   |        |             |                                                                             |                                                                                            |
|------------------------------|-------------------|--------|-------------|-----------------------------------------------------------------------------|--------------------------------------------------------------------------------------------|
| Garcia-Palacios et al. [28]* | Fibromyalgia      | Spain  | F-EMA       | Fatigue, Sleep, Pain                                                        | Assessment of App usability and/or acceptability                                           |
| Nishiguchi et al. [29] *     | RA                | Japan  | N/A         | Gait, Pain, Disease activity, HAQ                                           | Assessment of App usability and/or acceptability.                                          |
| de la Vega et al. [30]*      | Fibromyalgia      | Spain  | Fibroline   | Pain, Fatigue, Sleep, Mood, Depression/Anxiety, Medication/Adherence        | Assessment of App usability and/or acceptability                                           |
| Salaffi et al. [31]*         | Axial spondylitis | Italy  | SPEAMonitor | Pain, Morning stiffness, BASDAI, BASFI ,HAQ                                 | Assessment of App usability and/or acceptability                                           |
| Yen et al. [32] *            | RA                | US     | READY       | Pain, Fatigue, Disease activity, Depression/Anxiety, HAQ, Morning stiffness | Assessment of App usability and/or acceptability                                           |
| Khurana et al. [33]*         | OA                | US     | N/A         | Fatigue, Medication/adherence                                               | Assessment of App usability and/or acceptability                                           |
| Kim et al. [34]*             | Spine disease     | Korea  | N/A         | Pain                                                                        | Assessment of App usability and/or acceptability                                           |
| Cai et al. [35]*             | JIA               | UK     | JIAApp      | Fatigue, Pain, Physical activity, Medication Adherence                      | Assessment of App usability and/or acceptability                                           |
| Revenas et al. [36]          | RA                | Sweden | tRAppen     | Physical activity                                                           | Description of the development and implementation process of an App                        |
| Synnott et al. [37]          | Ankle sprain      | Norway | ReApp       | Physical activity                                                           | Description of the development and implementation process of an App                        |
| Bromberg et al. [38]         | JIA               | US     | N/A         | Fatigue, Sleep, Pain.                                                       | Assessment of temporal relation between pain, fatigue and other disease related variables  |
| Bromberg et al. [39]         | JIA               | US     | N/A         | Fatigue, Sleep, Pain.                                                       | Assessment of temporal relation between pain, fatigue and other disease related variables  |
| Okifuji et al. [40]          | Fibromyalgia      | US     | N/A         | Fatigue, Sleep, Pain, depression/Anxiety                                    | Assessment of temporal relation between pain, fatigue and other disease related variables. |

|                        |    |             |                          |                                        |                                                                                                              |
|------------------------|----|-------------|--------------------------|----------------------------------------|--------------------------------------------------------------------------------------------------------------|
| Nishiguchi et al. [41] | RA | Japan       | N/A                      | Pain, Disease activity, HAQ, Gait.     | Measurement of RA disease activity and other disease related variables using an App                          |
| Shinohara et al. [42]  | RA | Japan       | N/A                      | Pain, TJC, SJC, Disease activity, HAQ, | Measurement of RA disease activity and other disease related variables using an App                          |
| Walker et al. [43]     | RA | Switzerland | COmPASS II               | Fatigue, Sleep, Pain                   | Measurement of RA disease activity and other disease related variables using an App                          |
| Yamada et al. [44]     | RA | Japan       | N/A                      | Gait                                   | Gait assessment using an App                                                                                 |
| Espinoza et al. [45]   | RA | US          | N/A                      | Grip, Disease Activity                 | Measurement of RA disease activity and other disease related variables using an App connected to a manometer |
| Kim et al. [46]        | OA | US          | IGetBetter <sup>R</sup>  | Physical activity                      | Assessment of physical activity through an APP + connected device                                            |
| Twiggs et al. [47]     | OA | US          | Fitbit Flex <sup>R</sup> | Physical activity                      | Assessment of physical activity through an APP + connected device                                            |

OA: Osteoarthritis, RA: Rheumatoid arthritis, JIA: Juvenile idiopathic arthritis, TJC: Tender Joint Count, SJC: Swollen joint count, HAQ: Health assessment questionnaire, BASDAI: Bath ankylosing spondylitis disease activity, BASFI: Bath ankylosing spondylitis functional index

Articles with the sign \$ refer to an intervention related to the behavior and articles with \* refer to an intervention related to monitoring based on the Behavioral Change Technique Taxonomy from Michie et al [47].
